# Supplementary material for: A predation cost to bold fish in the wild
Source: PubMed Central journal article supplement (PMC5430796; doi:10.1038/s41598-017-01270-w), 2017-04-27
Supplement: 41598_2017_1270_MOESM1_ESM.pdf [file 41598_2017_1270_MOESM1_ESM.pdf]

## Supplementary material to the manuscript:

A predation cost to bold fish in the wild

Kaj Hulthén<sup>1\*†</sup>, Ben B. Chapman<sup>2†</sup>, P. Anders Nilsson<sup>1,3</sup>, Lars-Anders Hansson<sup>1</sup>,  
Christian Skov<sup>4</sup>, Jakob Brodersen<sup>5</sup>, Jerker Vinterstare<sup>1</sup> and Christer Brönmark<sup>1</sup>

<sup>1</sup>Department of Biology - Aquatic Ecology, Ecology Building, Lund University, SE-223 62 Lund, Sweden.

<sup>2</sup>School of Biological Sciences, Division of Evolution and Genomics, University of Manchester, Oxford Rd, Manchester M139PL, UK.

<sup>3</sup>Department of Environmental and Life Sciences - Biology, Karlstad University, SE-651 88, Karlstad, Sweden.

<sup>4</sup>National Institute of Aquatic Resources, Technical University of Denmark (DTU), Vejløvej 39, Silkeborg 8600, Denmark.

<sup>5</sup>Department of Fish Ecology and Evolution, EAWAG Swiss Federal Institute of Aquatic Science and Technology, Center for Ecology, Evolution and Biogeochemistry, Seestrasse 79, 6047, Kastanienbaum, Switzerland.

\*Corresponding author: Kaj Hulthén mail: kaj.hulthen@biol.lu.se; Tel.: +46462228437; Address: Department of Biology, Lund University, Ecology Building, SE-223 62 Lund, Sweden.

† K. Hulthén and B.B. Chapman contributed equally to this work

## SUPPLEMENTARY INFORMATION

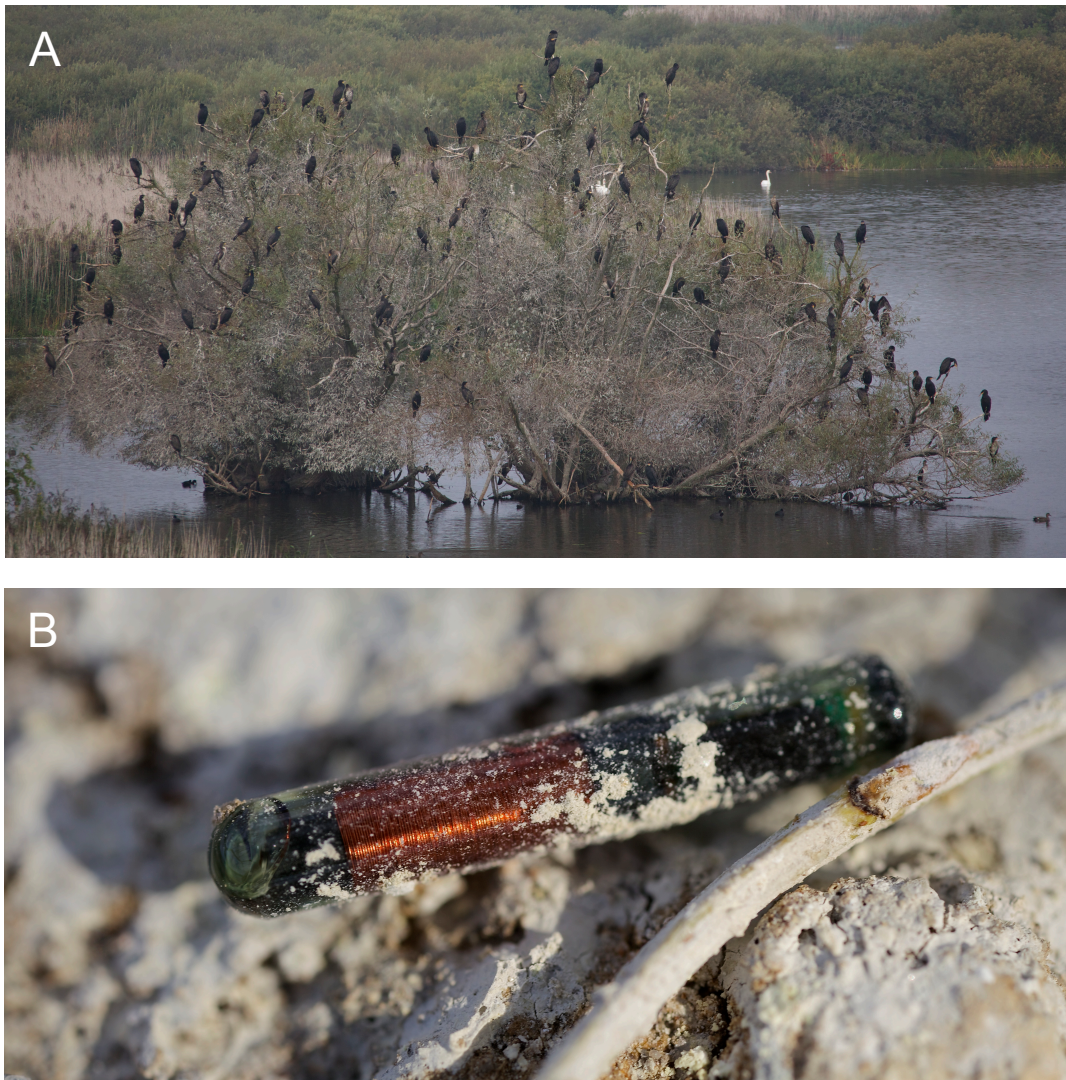

**Figure 1** (A) Cormorants congregate to roost in lake Krankesjön after a day of fishing [Photo: Kaj Hulthén] (B) Electronic PIT tags with unique identity codes, originally implanted in behaviourally assayed roach and subsequently consumed by cormorants, are regurgitated at the well-defined roost [Photo: Jerker Vinterstare].
